# Supplementary material
Source: Springer Nature journal article supplement (https://www.springermedizin.de/resource/supplementary/12916_2010_457_MOESM2_ESM.pdf/9599706)

*Vocation/Engagement*

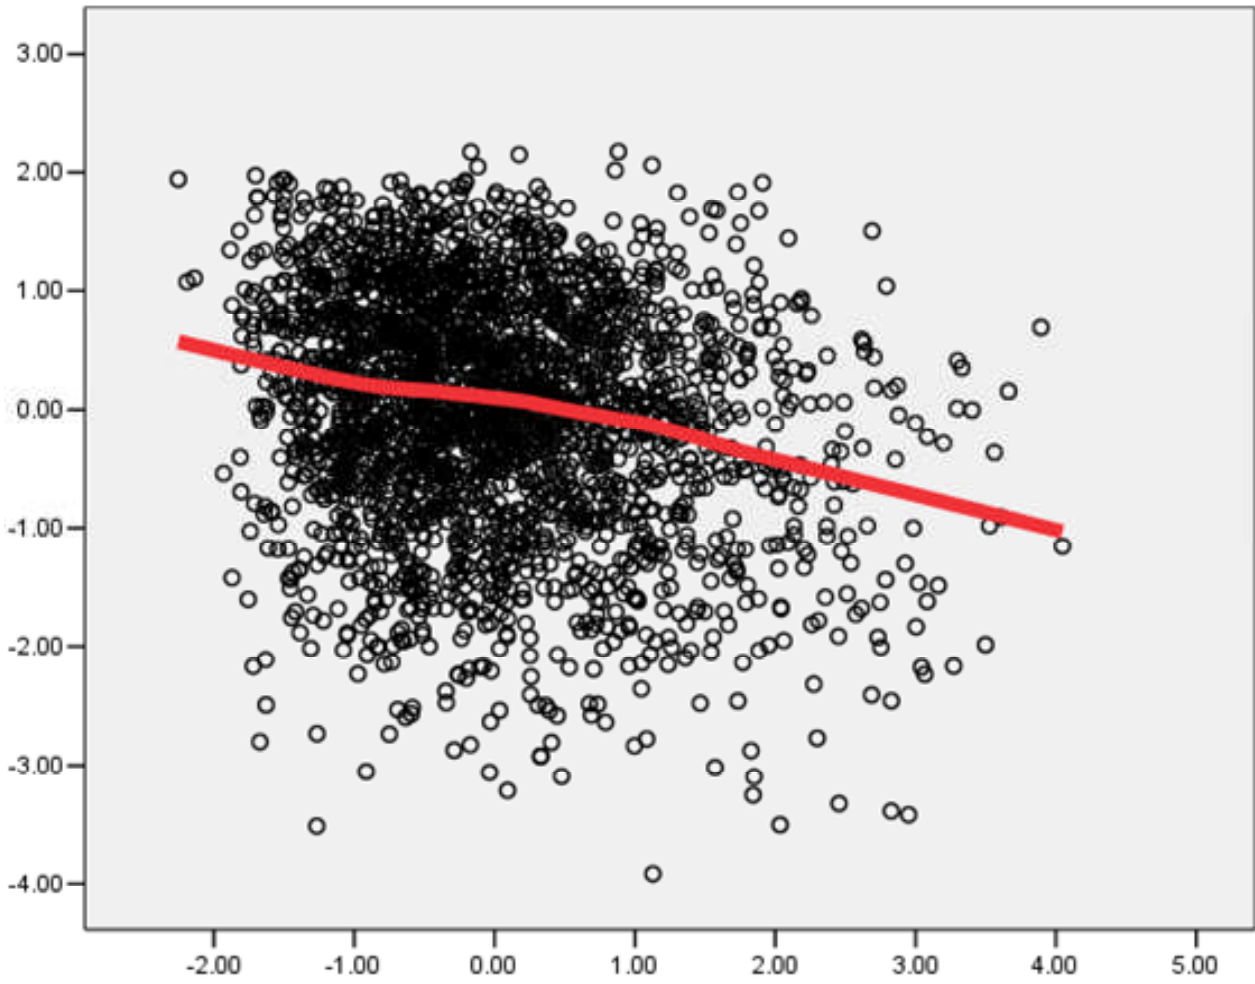

*BurnedOut*

Supplement: MOESM2 [file 9599706]
